# Supplementary material for: Significance of Neutrophil Gelatinase-Associated Lipocalin (NGAL) and Proprotein Convertase Subtilisin/Kexin Type 9 (PCSK9) for the Monitoring of Treatment Response to Cyclosporine in Patients with Psoriasis
Source: MDPI journal article supplement (doi:10.3390/life13091873), 2023-09-06
Supplement: s1 [file s1]

Type of the Paper (original research manuscript.)

# Significance of neutrophil gelatinase-associated lipocalin (NGAL) and proprotein convertase subtilisin/kexin type 9 (PCSK9) for the monitoring of treatment response to cyclosporine in patients with psoriasis.

## - supplementary file -

Change of psoriatic characteristics and lipids levels before and after the treatment when patients with previous acitretin therapy were excluded.

|                                       | PASI          | BSA            | TChol     | HDL       | LDL       | TG        |
|---------------------------------------|---------------|----------------|-----------|-----------|-----------|-----------|
| all patients together (n=40)          |               |                |           |           |           |           |
| before                                | 18.4          | 35.0           | 5.4 ± 1.0 | 1.3 ± 0.2 | 4.1 ± 1.1 | 1.8 ± 0.8 |
| after                                 | 14.4          | 22.5           | 5.2 ± 0.9 | 1.1 ± 0.2 | 3.7 ± 0.9 | 1.9 ± 0.7 |
| p-value                               | <0.001        | <0.001         | 0.52      | 0.03      | 0.08      | 0.5       |
| responders to cyclosporine (n=14)     |               |                |           |           |           |           |
| before                                | 22.0 ± 7.6    | 44.0 ± 18.1    | 5.6       | 1.2       | 4.3       | 1.8       |
| after                                 | 4.6 ± 3.0     | 6.0 ± 3.5      | 5.4       | 1.1       | 3.7       | 1.85      |
| p-value                               | <0.001        | <0.001         | 0.7       | 0.37      | 0.1       | 0.5       |
| Δ [%] (range)                         | 79<br>(61-99) | 81<br>(68-97%) |           |           |           |           |
| non-responders to cyclosporine (n=24) |               |                |           |           |           |           |
| before                                | 19.6 ± 6.5    | 34.0           | 5.1       | 1.3 ± 0.3 | 4.0 ± 1.1 | 1.7 ± 0.9 |
| after                                 | 18.0 ± 5.4    | 26.0           | 5.0       | 1.2 ± 0.2 | 3.7 ± 1.0 | 1.8 ± 0.8 |
| p-value                               | 0.38          | 0.02           | 0.63      | 0.04      | 0.3       | 0.6       |
| Δ [%] (range)                         | 14<br>(-3-22) | 19<br>(-14-33) |           |           |           |           |

U Mann-Whitney test or t-Student test

Serum level of PCSK9 and NGAL before and after the treatment when patients with previous acitretin therapy were excluded.

|                | PCSK9 [ng/mL] |       |         | NGAL [pg/mL] |       |         |
|----------------|---------------|-------|---------|--------------|-------|---------|
|                | before        | after | p-value | before       | after | p-value |
| all patients   | 70            | 67    | 0.89    | 2677         | 2498  | 0.74    |
| non-responders | 60            | 65    | 0.23    | 2292         | 3850  | 0.07    |
| responders     | 89            | 69    | 0.14    | 3530         | 1782  | 0.006   |

U Mann-Whitney test

Correlations between characteristics of psoriasis, lipids levels and PCSK9, NGAL, at the baseline and after the treatment with cyclosporine, when patients with previous acitretin therapy were excluded.

|       | PCSK9 r (p-value) |                 | NGAL r (p-value) |                  |
|-------|-------------------|-----------------|------------------|------------------|
|       | before            | after           | before           | after            |
| PASI  | 0.004<br>(0.99)   | 0.02<br>(0.89)  | 0.86<br>(<0.001) | 0.68<br>(<0.001) |
| BSA   | -0.04<br>(0.82)   | 0.08<br>(0.65)  | 0.42<br>(0.01)   | 0.51<br>(<0.001) |
| TChol | 0.67<br>(<0.001)  | 0.46<br>(0.004) | - 0.04<br>(0.83) | -0.33<br>(0.05)  |
| HDL   | -0.04<br>(0.79)   | -0.14<br>(0.41) | 0.19<br>(0.27)   | 0.38<br>(0.02)   |
| LDL   | 0.65<br>(<0.001)  | 0.5<br>(0.002)  | - 0.05<br>(0.78) | -0.33<br>(0.04)  |
| TG    | 0.07<br>(0.68)    | -0.17<br>(0.31) | 0.01<br>(0.93)   | -0.06<br>(0.7)   |

Spearman's correlation coefficient
